# Supplementary material for: AQP2 Plasma Membrane Diffusion Is Altered by the Degree of AQP2-S256 Phosphorylation
Source: PubMed Central journal article supplement (PMC5133805; doi:10.3390/ijms17111804), 2016-10-28
Supplement: ijms-17-01804-s001.pdf [file ijms-17-01804-s001.pdf]

# Supplementary Materials: AQP2 Plasma Membrane Diffusion Is Altered by the Degree of AQP2-S256 Phosphorylation

Eva C. Arnspang, Frédéric H. Login, Jennifer S. Koffman, Prabuddha Sengupta and Lene N. Nejsum

**Table S1.** Plasmids used in this study.

| Plasmids                    | Description <sup>a</sup>                                                                                                                                                                          | Reference  |
|-----------------------------|---------------------------------------------------------------------------------------------------------------------------------------------------------------------------------------------------|------------|
| pEGFP-AQP2*                 | AQP2 <sup>I54T</sup> with a C-terminal c-Myc tag in pEGFP-C1. EGFP fused to the N-terminus of AQP2 <sup>I54T</sup> that has a C-terminal c-Myc tag, Km <sup>r</sup> .                             | [37]       |
| pcDNA1-AQP2*                | AQP2 <sup>I54T</sup> with a C-terminal c-Myc tag in pcDNA1/Neo. AQP2 <sup>I54T</sup> with a C-terminal c-Myc tag, Km <sup>r</sup> .                                                               | [38]       |
| pEGFP-AQP2 <sup>wt</sup>    | pEGFP-AQP2* without the I54T mutation.                                                                                                                                                            | This study |
| pcDNA1-AQP2 <sup>wt</sup>   | pcDNA1-AQP2* without the I54T mutation.                                                                                                                                                           | This study |
| pEGFP-AQP2 <sup>S256D</sup> | pEGFP-AQP2 <sup>wt</sup> with S256D point mutation. This construct is annotated AQP2-S256D-EGFP in the text.                                                                                      | This study |
| pEGFP-AQP2 <sup>S256A</sup> | pEGFP-AQP2 <sup>wt</sup> with S256A point mutation. This construct is annotated AQP2-S256A-EGFP in the text.                                                                                      | This study |
| pcDNA3.1/zeo(+)             | Mammalian expression vector, CMV promoter, Amp <sup>r</sup> .                                                                                                                                     | Invitrogen |
| pcDNA-AQP2 <sup>wt</sup>    | AQP2 <sup>wt</sup> with a C-terminal c-Myc tag subcloned from pcDNA1-AQP2 <sup>wt</sup> into pcDNA3.1/zeo(+) using <i>XhoI</i> and <i>XbaI</i> . This construct is annotated AQP2 WT in the text. | This study |
| pcDNA-AQP2 <sup>S256D</sup> | pcDNA-AQP2 <sup>wt</sup> with S256D point mutation. This construct is annotated AQP2-S256D in the text.                                                                                           | This study |
| pcDNA-AQP2 <sup>S256A</sup> | pcDNA-AQP2 <sup>wt</sup> with S256A point mutation. This construct is annotated AQP2-S256A in the text.                                                                                           | This study |
| pPAGFP-C1                   | Mammalian expression vector for N-terminal fusion with photoactivatable GFP (PAGFP), Km <sup>r</sup> .                                                                                            | [46]       |
| pPAGFP-AQP2 <sup>wt</sup>   | AQP2 <sup>wt</sup> with a C-terminal c-Myc tag in pPAGFP-C1. This construct is annotated AQP2 WT-PAGFP in the text.                                                                               | This study |

<sup>a</sup> Km<sup>r</sup>, kanamycin resistance; Amp<sup>r</sup>, Ampicillin resistance.

**Table S2.** Primers used in this study.

| Primer Name  | Primer Sequence (5'-3')                  | Description                                                 |
|--------------|------------------------------------------|-------------------------------------------------------------|
| F-CMV        | cgcaaatgggtaggtagcgtg                    | For amplification with pcDNA-AQP2 <sup>wt</sup> as template |
| R-BGH        | actagaaggcagctcaggcgtg                   |                                                             |
| F-EGFP-C     | catggtcctctgtagtctcgtg                   | For amplification with pEGFP-AQP2 as template               |
| R-pBABE      | accctaactgacacacattcc                    |                                                             |
| R-AQP2_S256D | gaggagagtggagctccacgtcctgcccgcgcact      | To introduce S256D point mutation                           |
| F-AQP2_S256D | agtgcggcggcggcaggacgtggagctccactctcctcag |                                                             |
| R-AQP2_S256A | ctgaggagagtggagctccactgctgcccgcgcact     | To introduce S256A point mutation                           |
| F-AQP2_S256A | agtgcggcggcggcaggcagtgtagctccactctcctcag |                                                             |
